# Supplementary material
Source: PubMed Central journal article supplement (PMC404087)

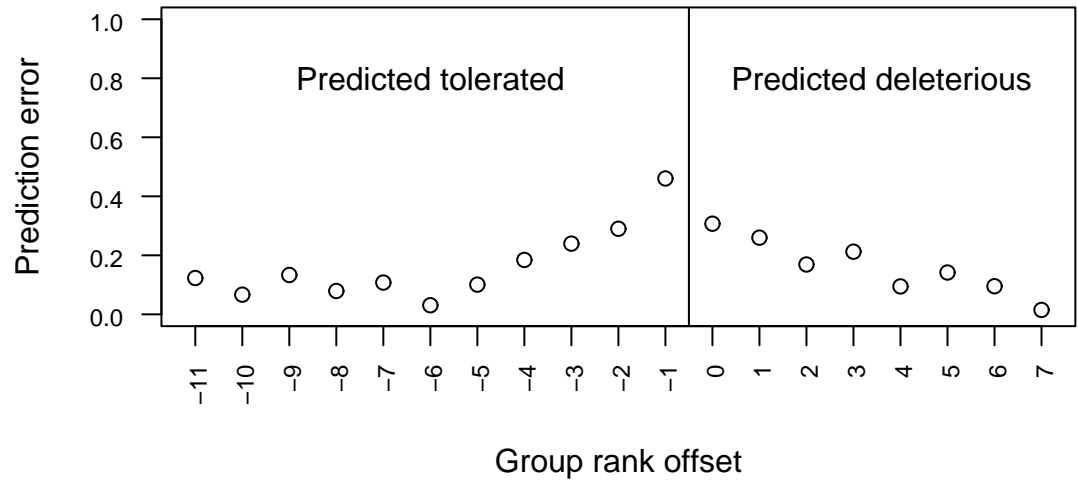

Supplement: pnas_101_17_6576__1.pdf [file pnas_101_17_6576__1.pdf]
